# Supplementary material for: Glioblastomas are composed of genetically divergent clones with distinct tumourigenic potential and variable stem cell-associated phenotypes
Source: Springer Nature journal article supplement (doi:10.1007/s00401-013-1196-4), 2013-10-23

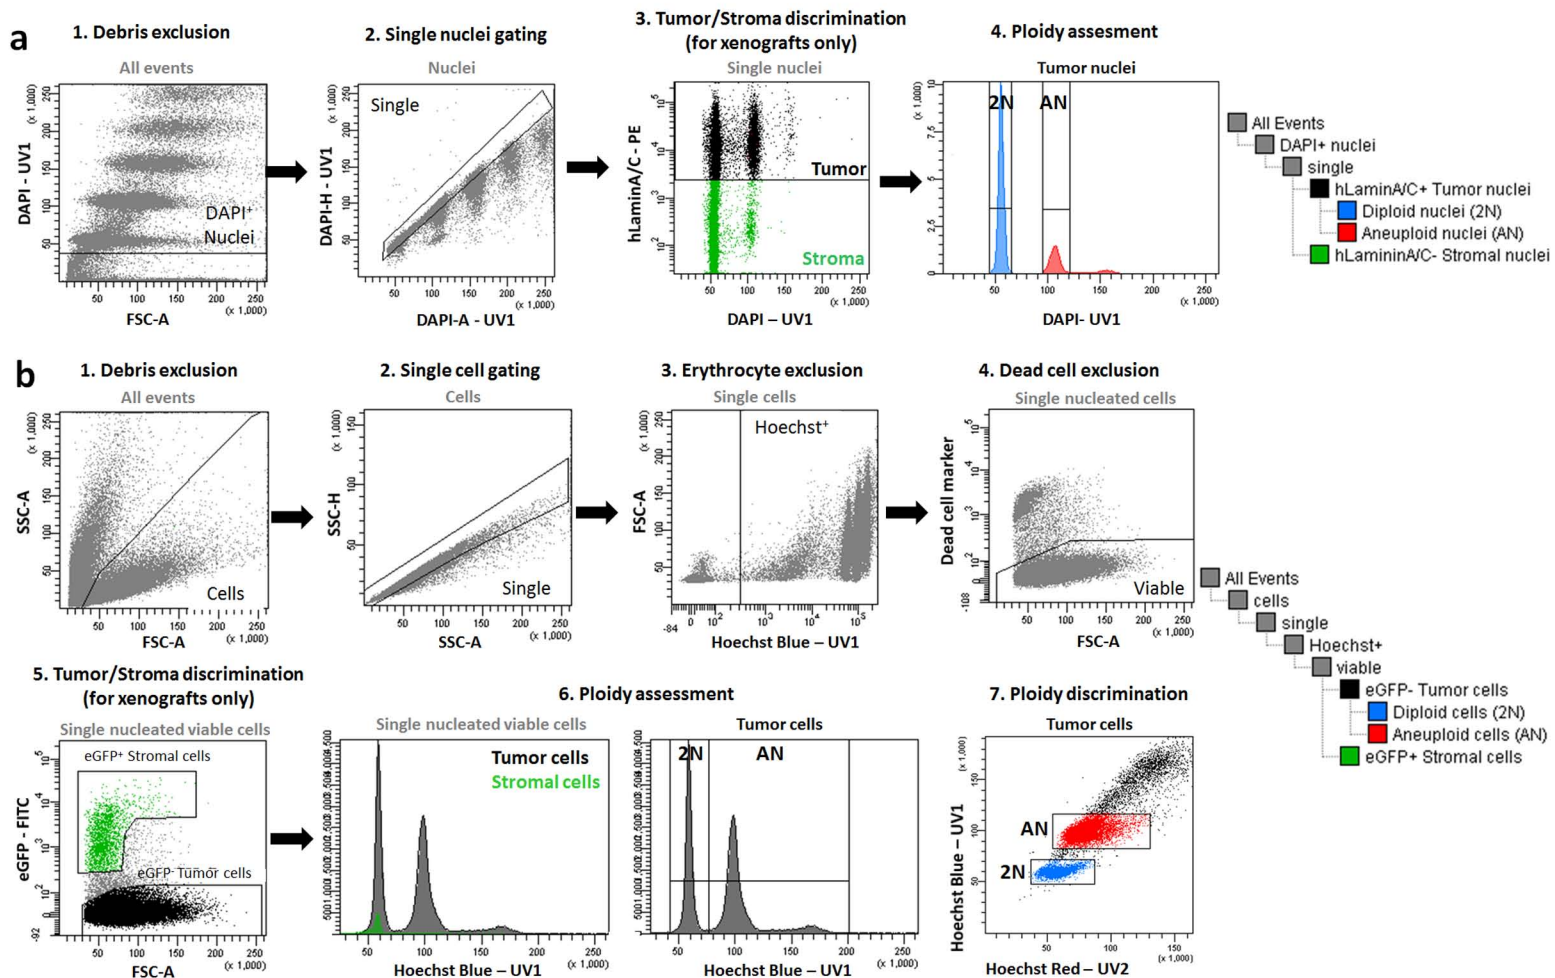

**a Monogenomic tumors**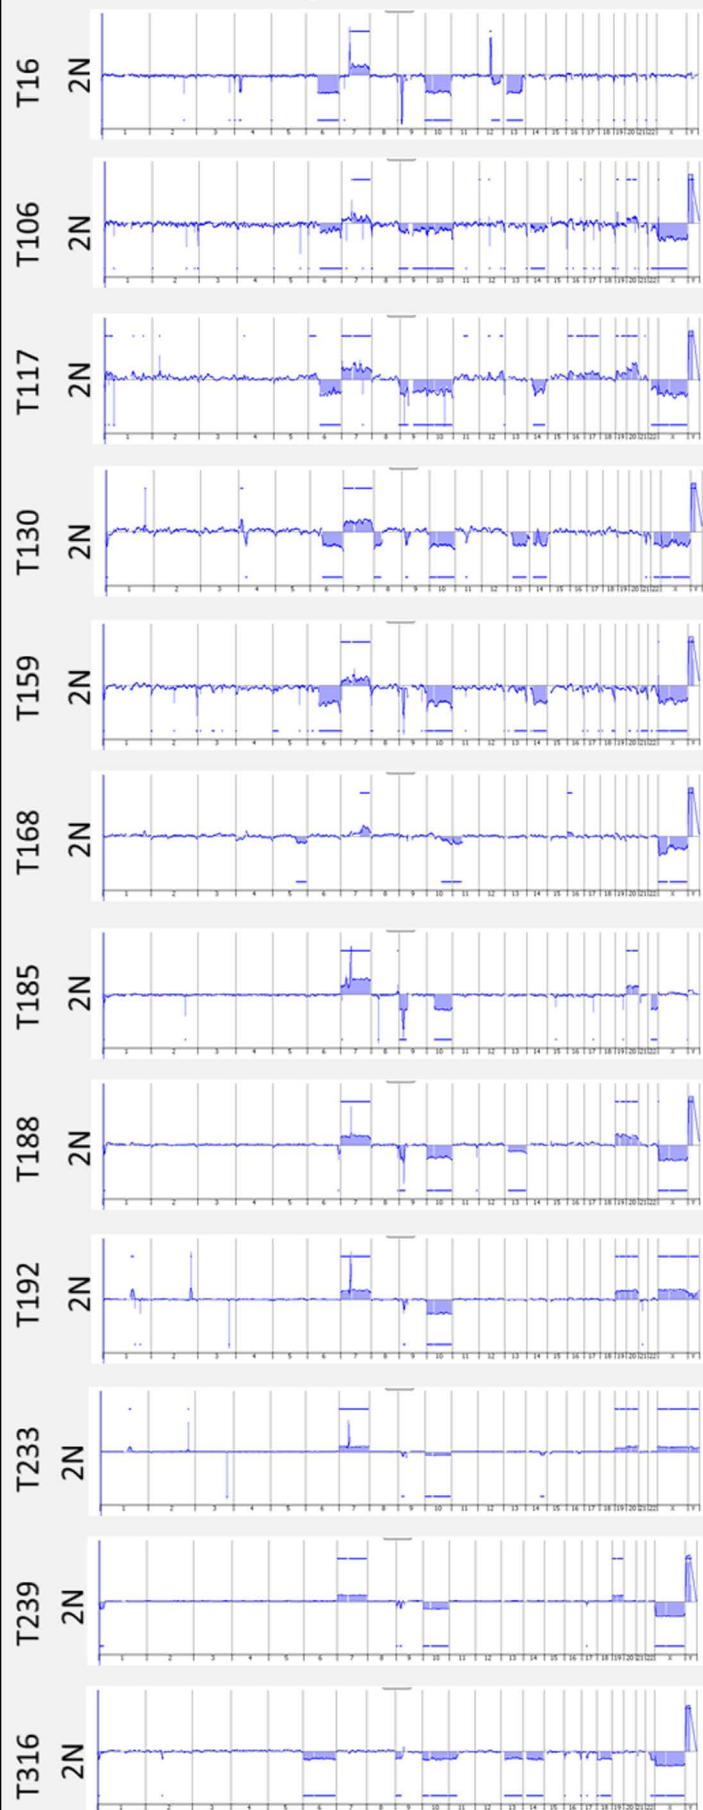**b Polygenomic tumors**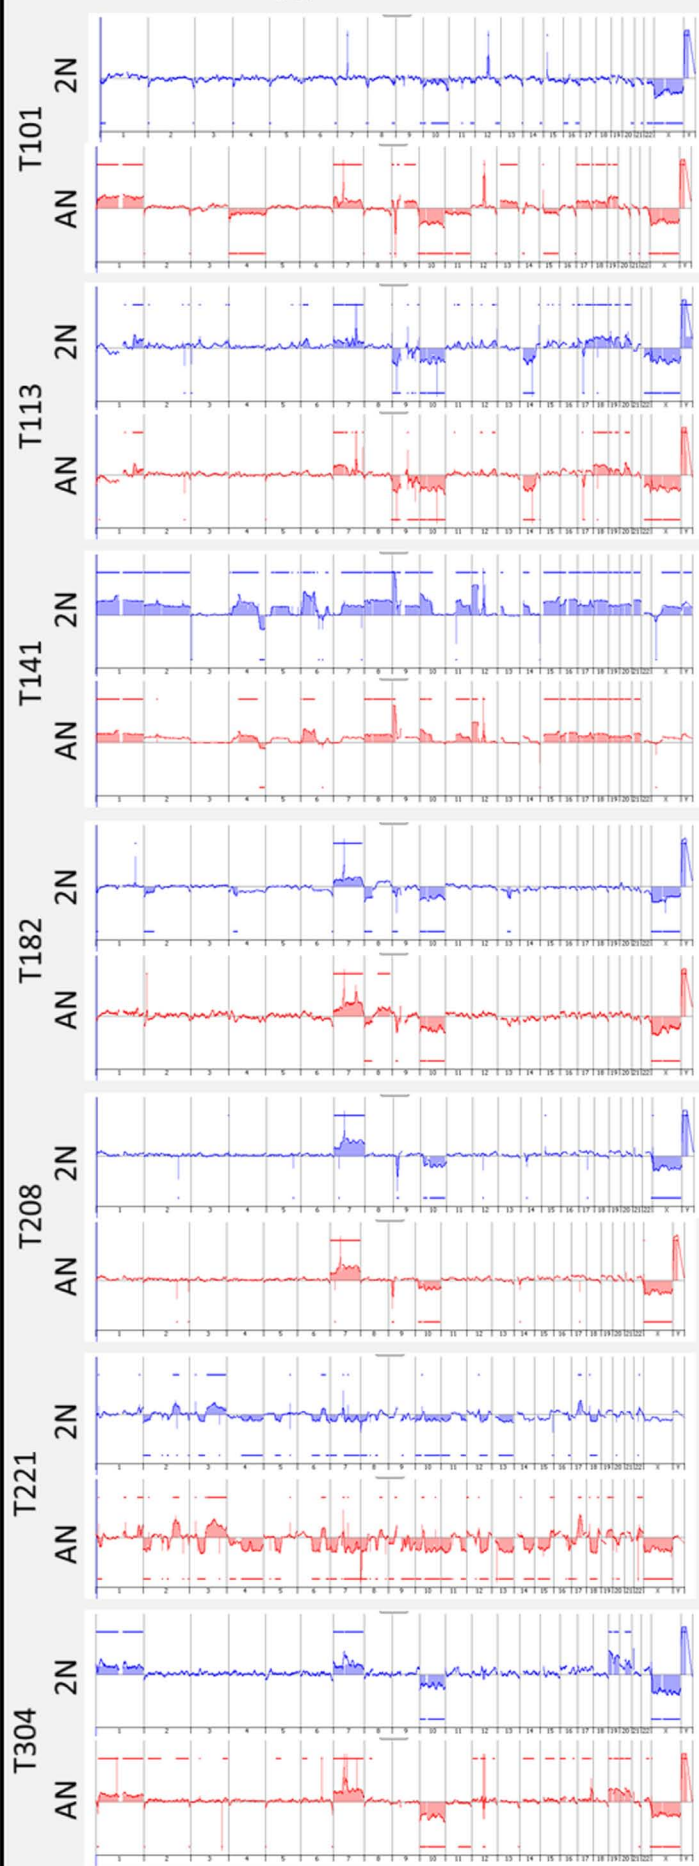

# Suppl. Fig 3

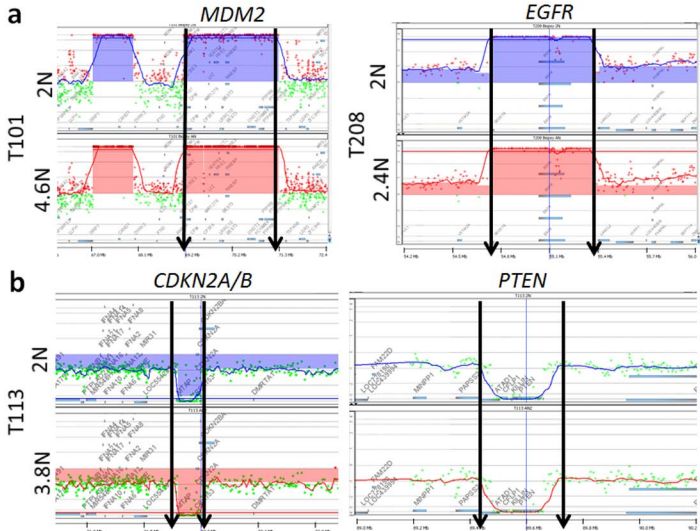

# Suppl. Fig 4

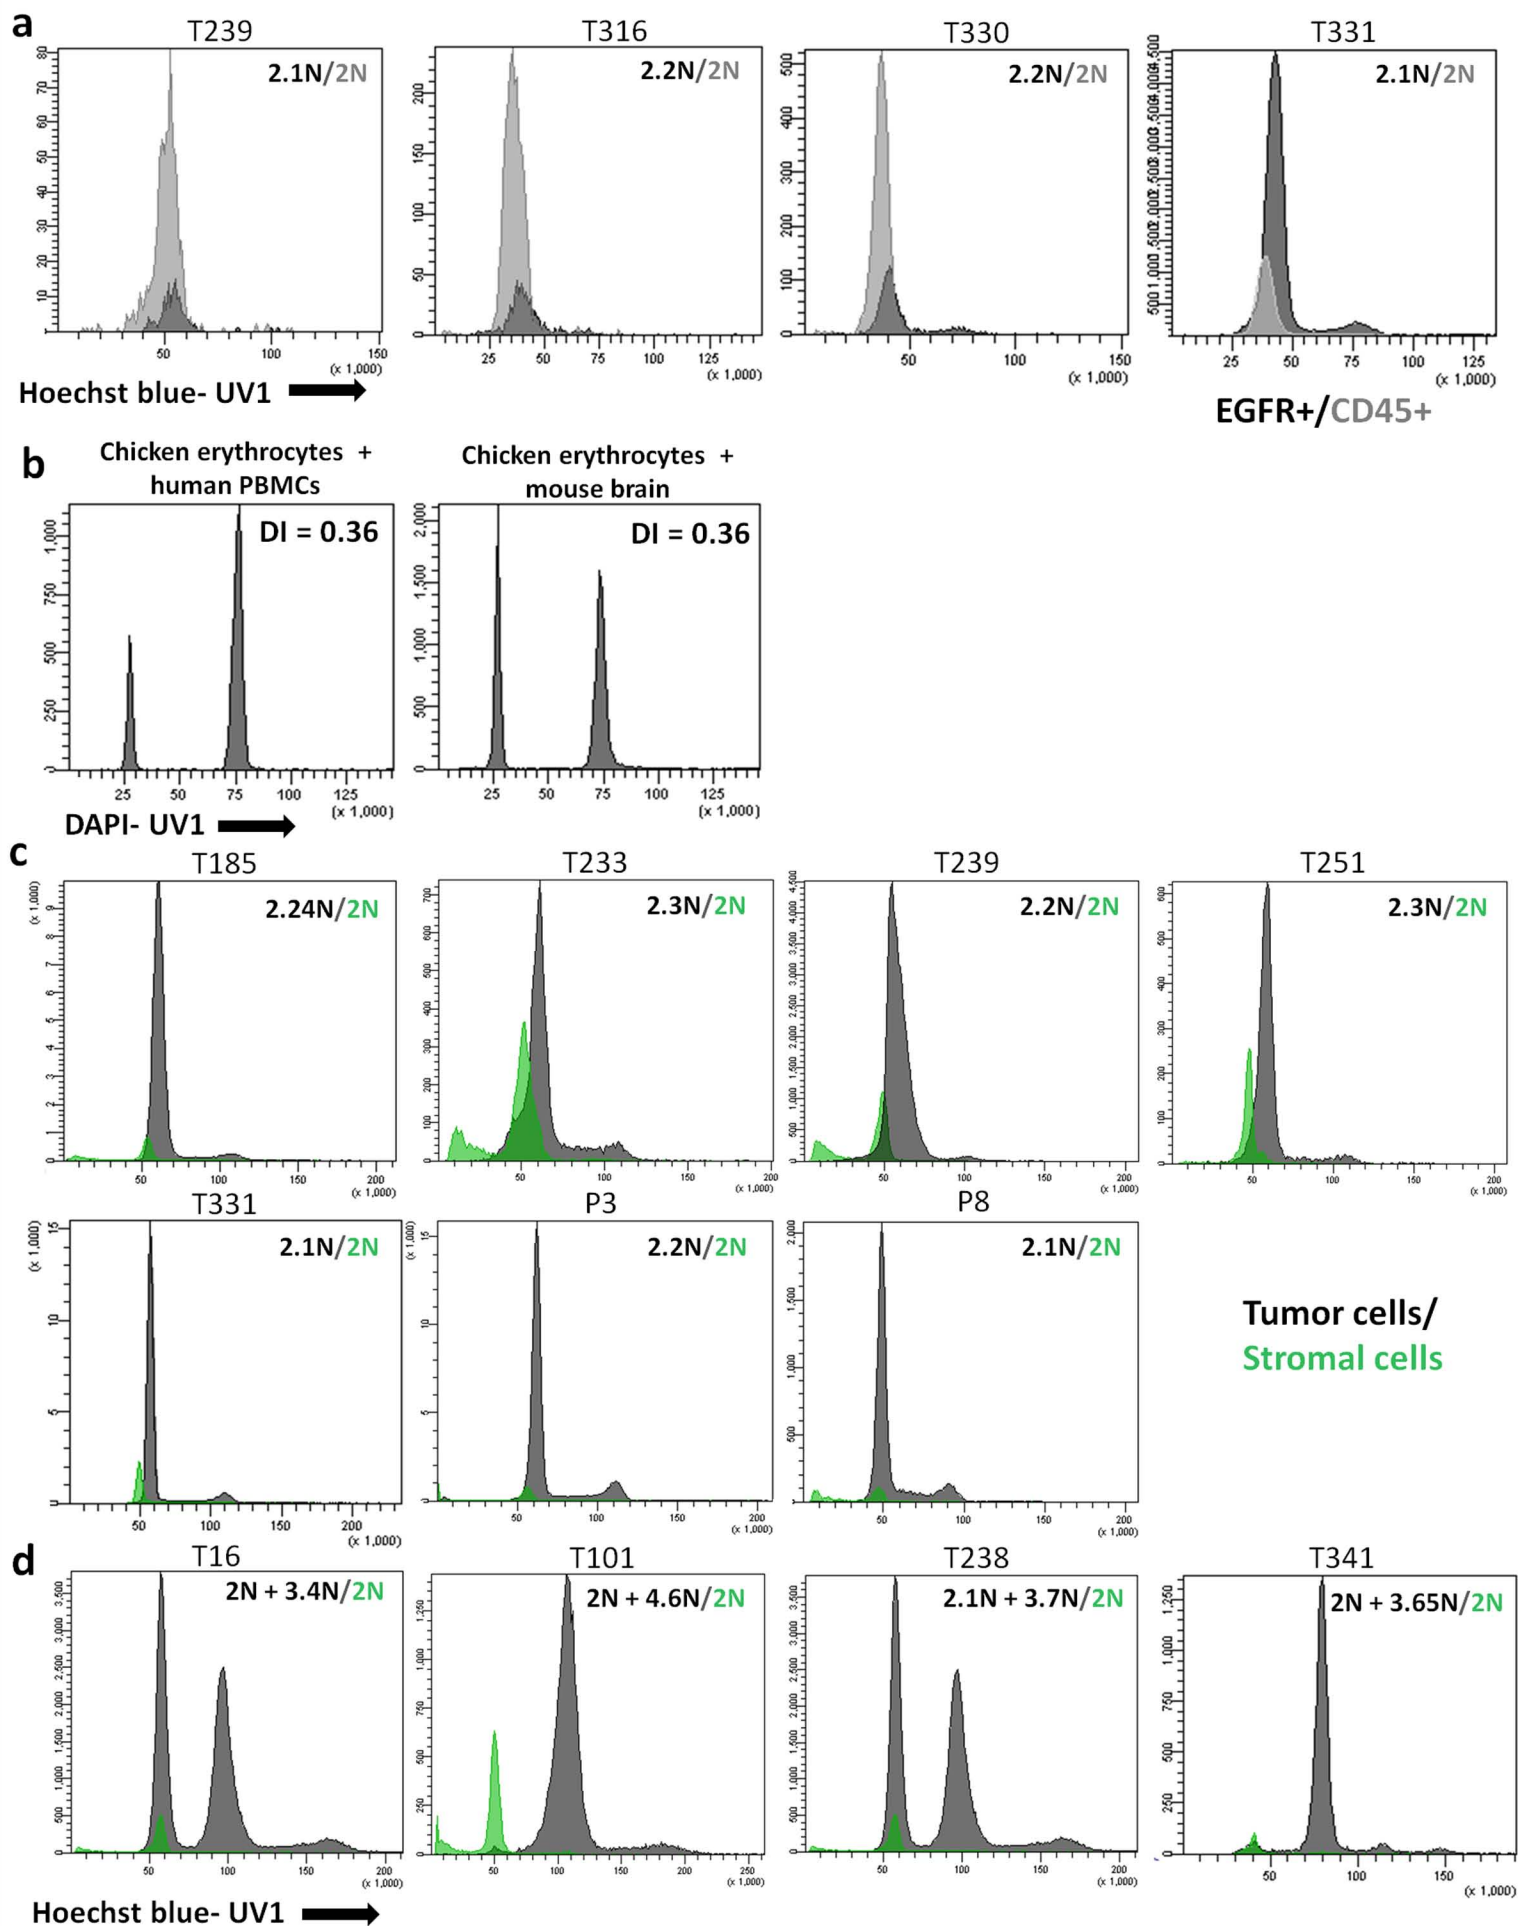

Supplement: MOESM1 [file 8404362]
